# Supplementary material for: Formation of calcium phosphate nanoparticles in the presence of carboxylate molecules: a time-resolved in situ synchrotron SAXS and WAXS study
Source: Royal Society of Chemistry journal article supplement (doi:10.1039/d2ce01227h), 2022-12-05
Supplement: d2ce01227h1.pdf [file d2ce01227h1.pdf]

## Electronic Supplementary Information

### Formation of calcium phosphates nanoparticles in presence of carboxylate molecules: A time-resolved *in situ* synchrotron SAXS and WAXS study

Dritan Siliqi<sup>a</sup>, Alessio Adamiano<sup>b</sup>, Massimo Ladisa<sup>c</sup>, Cinzia Giannini<sup>a</sup>, Michele Iafisco<sup>b,\*</sup>, Lorenzo Degli Esposti<sup>b,\*</sup>

<sup>a</sup> Institute of Crystallography (IC), National Research Council (CNR), Via Amendola 122/O, 70126, Bari, Italy

<sup>b</sup> Institute of Science and Technology for Ceramics (ISTEC), National Research Council (CNR), Via Granarolo 64, 48018, Faenza, Italy

<sup>c</sup> Istituto per le Applicazioni del Calcolo "Mauro Picone" (IAC), National Research Council (CNR), Via Amendola 122/I, 70126, Bari, Italy

#### Corresponding authors

Michele Iafisco (michele.iafisco@istec.cnr.it),

Lorenzo Degli Esposti (lorenzo.degliesposti@istec.cnr.it)

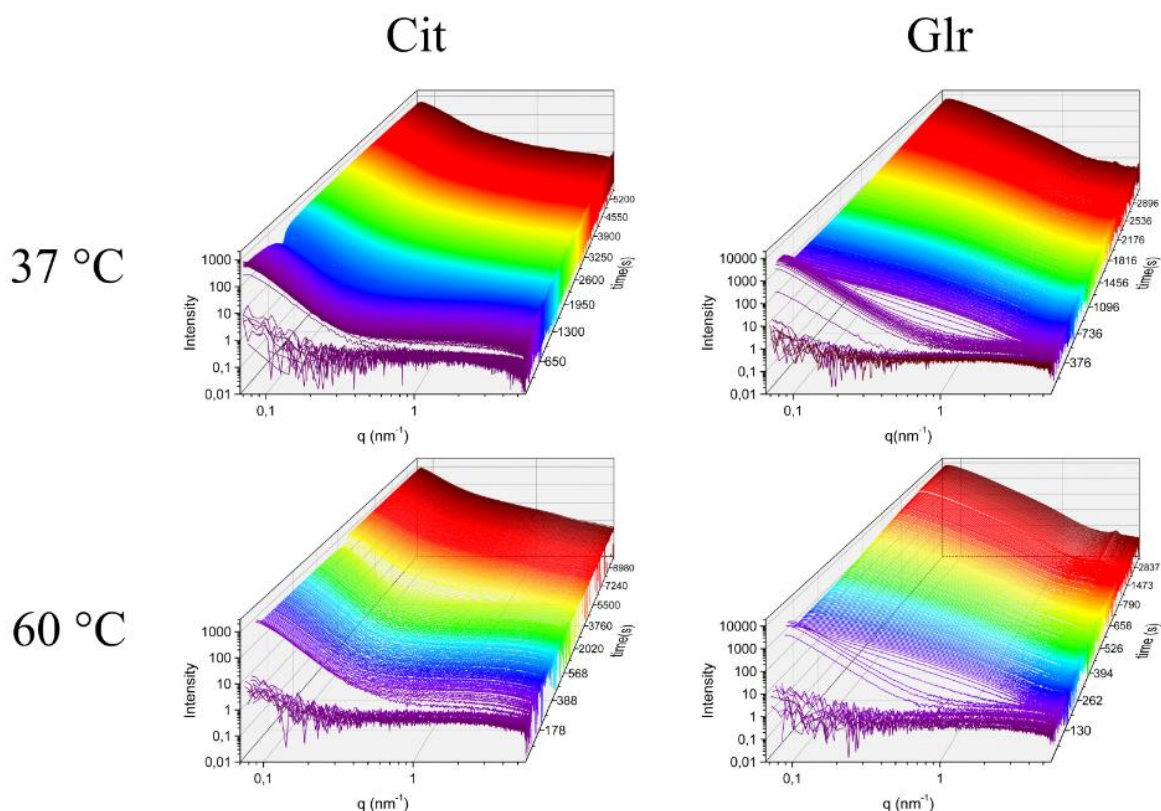

**Figure S1.** Stack-plots of the measured SAXS curves as a function of time during the formation of the HA nanoparticles at 37 °C and 60 °C.

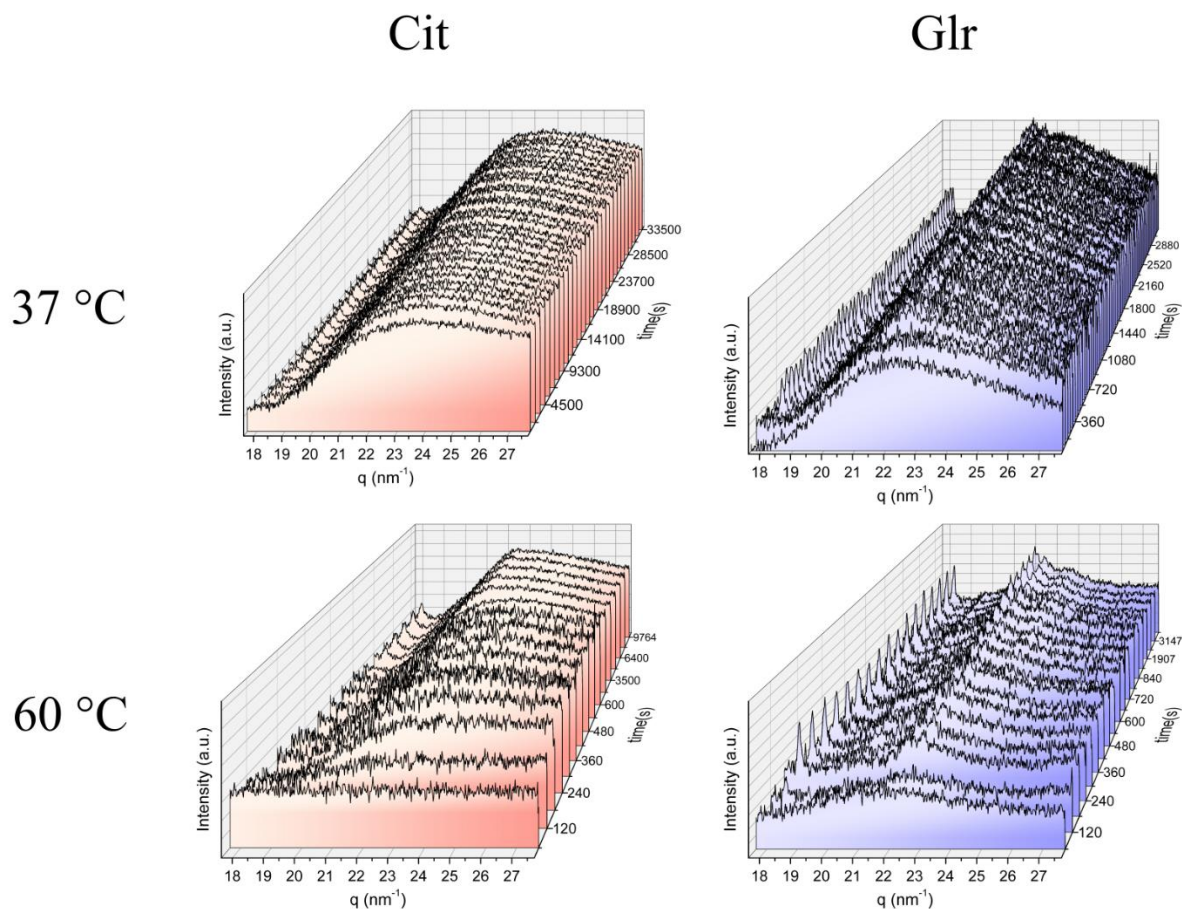

**Figure S2.** Stack-plots of the measured WAXS curves as a function of time during the formation of the HA nanoparticles at 37 °C and 60 °C.

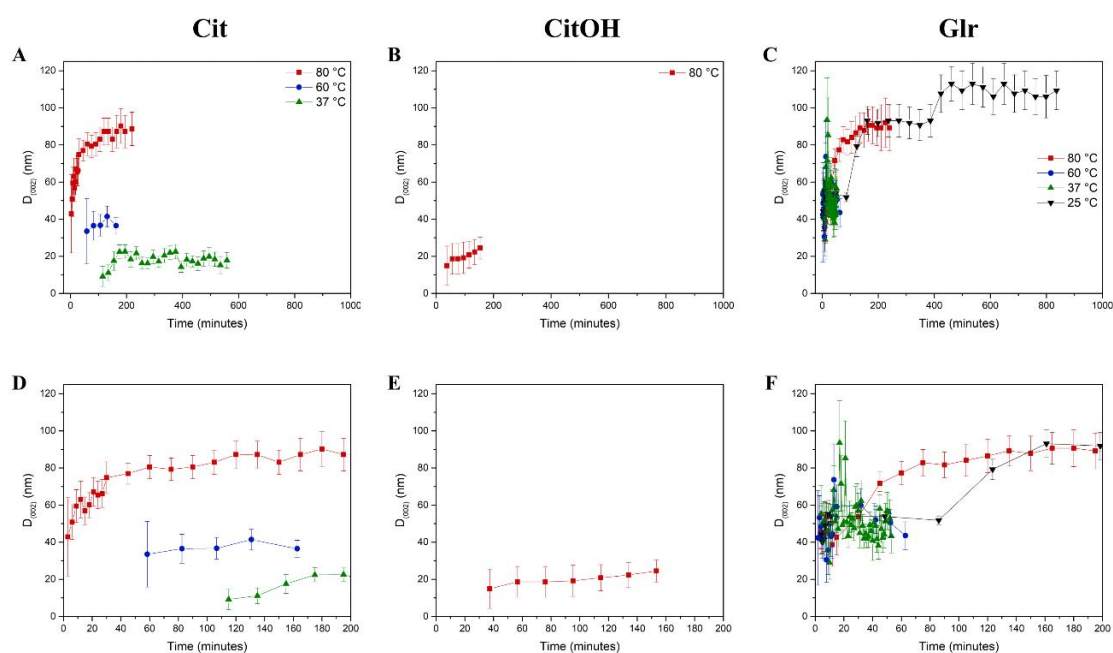

**Figure S3.** Time evolution of  $D_{[002]}$  crystalline domains in function of reaction temperature for (A,D) Cit, (B, E) CitOH and (C,F) Glr. Figures D, E, F are an enlargement of the first 200 min of reaction.

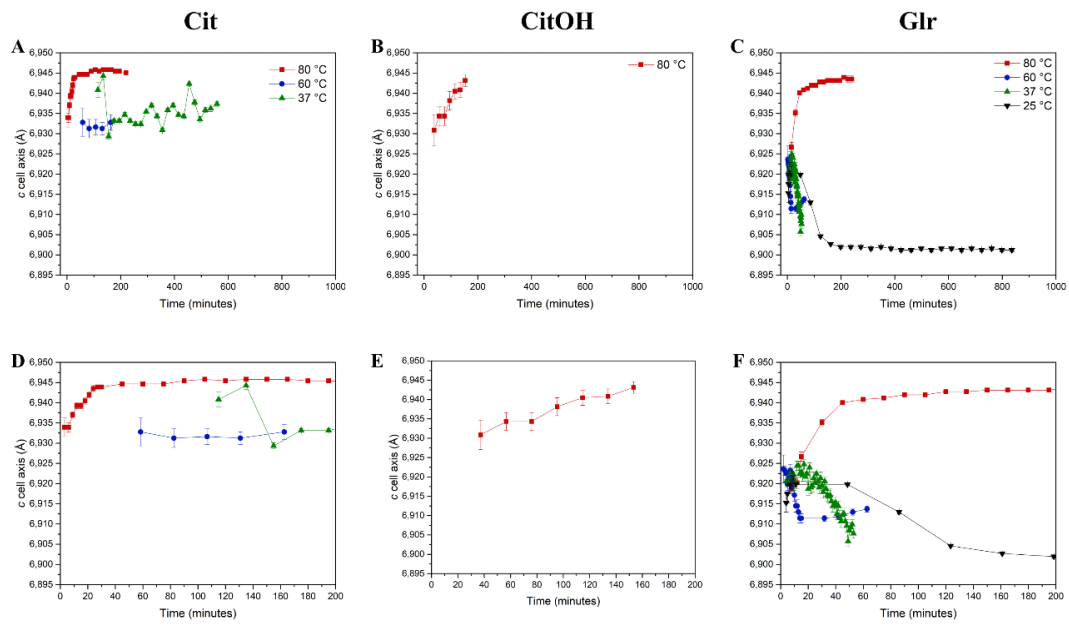

**Figure S4.** Time evolution of HA c-cell axis length in function of reaction temperature for (A,D) Cit, (B,E) CitOH and (C,F) Glr. Figures D, E, F are an enlargement of the first 200 min of reaction.
